# Supplementary material for: Longitudinal Genome-Wide Study Reveals Genetic Architecture of Resilience Using a Novel Phenotype
Source: Research Square preprint supplement (doi:10.21203/rs.3.rs-4861048/v1), 2025-03-19
Supplement: Supplementary file 1 [file 97b43af0ef826d340a16bedf.docx]

Supplementary Table 1: Sociodemographic characteristics of the sample, grouped by their binary trajectory resilient phenotype

| **Variable** | **Non-resilient** | **Resilient** | **p-value2** |
| --- | --- | --- | --- |
|  | **N = 3,6691** | **N = 4,1901** |  |
| **Sex** |  |  | <0.001 |
| **Male** | 1,980 (54%) | 2,050 (49%) |  |
| **Female** | 1,689 (46%) | 2,140 (51%) |  |
| **Maternal Age** | 28.0 (25.0, 32.0) | 29.0 (26.0, 32.0) | <0.001 |
| **Homeownership Status at Birth** |  |  | <0.001 |
| **Owned** | 2,864 (78%) | 3,431 (82%) |  |
| **Rented** | 805 (22%) | 759 (18%) |  |
| **Marital Status at Birth** |  |  | <0.001 |
| **Not Married** | 892 (24%) | 814 (19%) |  |
| **Married** | 2,777 (76%) | 3,376 (81%) |  |
| **Parity** |  |  | <0.001 |
| **0** | 1,742 (47%) | 1,780 (42%) |  |
| **1** | 1,227 (33%) | 1,503 (36%) |  |
| **2** | 503 (14%) | 628 (15%) |  |
| **3** | 141 (3.8%) | 181 (4.3%) |  |
| **4** | 42 (1.1%) | 69 (1.6%) |  |
| **5+** | 14 (0.4%) | 29 (0.7%) |  |
| **Ethnicity** |  |  | 0.3 |
| **White** | 3,641 (99%) | 4,166 (99%) |  |
| **BAME** | 28 (0.8%) | 24 (0.6%) |  |
| **Maternal BMI** |  |  | 0.056 |
| **Underweight** | 209 (5.7%) | 198 (4.7%) |  |
| **Normal weight** | 2,593 (71%) | 3,068 (73%) |  |
| **Overweight** | 605 (16%) | 651 (16%) |  |
| **Obese** | 262 (7.1%) | 273 (6.5%) |  |
| **Maternal Highest Education** |  |  | 0.009 |
| **CSE** | 648 (18%) | 676 (16%) |  |
| **Vocational** | 353 (9.6%) | 360 (8.6%) |  |
| **O level** | 1,264 (34%) | 1,387 (33%) |  |
| **A level** | 847 (23%) | 1,059 (25%) |  |
| **Degree** | 557 (15%) | 708 (17%) |  |
| **Paternal Highest Education** |  |  | <0.001 |
| **CSE** | 886 (24%) | 943 (23%) |  |
| **Vocational** | 307 (8.4%) | 333 (7.9%) |  |
| **O level** | 807 (22%) | 860 (21%) |  |
| **A level** | 966 (26%) | 1,078 (26%) |  |
| **Degree** | 703 (19%) | 976 (23%) |  |
| **Birthweight (kg)** | 3.44 (3.10, 3.76) | 3.46 (3.15, 3.80) | 0.003 |
| **Gestation** |  |  | 0.53 |
| **Extremely Preterm** | 9 (0.2%) | 8 (0.2%) |  |
| **Very Preterm** | 29 (0.8%) | 31 (0.7%) |  |
| **Late Preterm** | 173 (4.7%) | 169 (4.0%) |  |
| **On Time** | 3,433 (94%) | 3,959 (94%) |  |
| **Post-term** | 25 (0.7%) | 23 (0.5%) |  |
| **Maternal Smoking in Pregnancy** | 722 (20%) | 647 (15%) | <0.001 |
| **Household Social Class** |  |  | 0.005 |
| **I - Professional** | 355 (9.7%) | 469 (11%) |  |
| **II - Managerial and technical** | 1,041 (28%) | 1,290 (31%) |  |
| **IIINM - Skilled non-manual** | 460 (13%) | 535 (13%) |  |
| **IIIM - Skilled manual** | 1,378 (38%) | 1,428 (34%) |  |
| **IV - Partly skilled** | 279 (7.6%) | 283 (6.8%) |  |
| **V - Unskilled** | 156 (4.3%) | 185 (4.4%) |  |
| **1Median (IQR) or Frequency (%)** |  |  |  |
| **2 Pearson’s Chi-squared test; Wilcoxon rank sum test** |  |  |  |

Supplementary table 2: Variant Effect Predictor Clumped Results

| CHR | F | SNP | BP | P | TOTAL | NSIG | S05 | S01 | S001 | S0001 | SP2 |
| --- | --- | --- | --- | --- | --- | --- | --- | --- | --- | --- | --- |
| 9 | 1 | rs77374979 | 2081278 | 4.02E-07 | 5 | 0 | 2 | 3 | 0 | 0 | rs11999634(1),rs113581922(1),rs10811366(1) |
| 11 | 1 | rs1906656 | 6468326 | 1.06E-06 | 1 | 0 | 0 | 0 | 0 | 1 | rs2723638(1) |
| 5 | 1 | rs10079405 | 1.25E+08 | 1.66E-06 | 1 | 0 | 0 | 0 | 1 | 0 | rs10065912(1) |
| 16 | 1 | rs2326459 | 84995658 | 4.41E-06 | 0 | 0 | 0 | 0 | 0 | 0 | NONE |
| 4 | 1 | rs4961 | 2906707 | 5.03E-06 | 41 | 0 | 0 | 7 | 21 | 13 | rs16843452(1),rs58968769(1),rs7654786(1),rs4690000(1),rs4690001(1),rs73082333(1),rs16843523(1),rs2097081(1),rs3796469(1),rs12645803(1),rs12650114(1),rs73189458(1),rs2237004(1),rs78509773(1),rs2071695(1),rs2282772(1),rs2282773(1),rs4690065(1),rs7664801(1),rs2282774(1),rs2285084(1),rs2239728(1),rs12642795(1),rs878931(1),rs2051560(1),rs61059620(1),rs11442520(1),rs4963(1),rs1012365(1),rs1263339(1),rs1263342(1),rs1263344(1),rs1263345(1),rs4964(1),rs1263347(1),rs1263349(1),rs2301374(1),rs1419045(1),rs2185885(1),rs1263338(1),rs2301376(1) |
| 3 | 1 | rs11705732 | 1.32E+08 | 6.26E-06 | 3 | 0 | 0 | 1 | 2 | 0 | rs17294590(1),rs28799272(1),rs28455632(1) |
| 3 | 1 | rs9808926 | 1.88E+08 | 1.29E-05 | 34 | 0 | 0 | 13 | 13 | 8 | rs112102329(1),rs201256766(1),rs146854826(1),rs56881250(1),rs9874300(1),rs74766110(1),rs73049520(1),rs73049523(1),rs73049525(1),rs73049527(1),rs6794701(1),rs6794788(1),rs112687502(1),rs6809858(1),rs9847471(1),rs9867565(1),rs9847914(1),rs6444265(1),rs58036023(1),rs16862690(1),rs76302640(1),rs76983072(1),rs74908345(1),rs9809671(1),rs9850681(1),rs2611612(1),rs9845490(1),rs9822360(1),rs2611623(1),rs10712751(1),rs146647993(1),rs2611622(1),rs78264179(1),rs505364(1) |
| 16 | 1 | rs2881053 | 25201470 | 0.000013 | 90 | 0 | 0 | 53 | 36 | 1 | rs11074677(1),rs16974325(1),rs1549852(1),rs35786780(1),rs2078112(1),rs1972764(1),rs12596254(1),rs1549851(1),rs6497809(1),rs79386458(1),rs12708670(1),rs12600171(1),rs919705(1),rs12597995(1),rs34152735(1),rs9930827(1),rs9933296(1),rs11074678(1),rs10681142(1),rs277906(1),rs277907(1),rs172134(1),rs277908(1),rs277909(1),rs277910(1),rs277911(1),rs277912(1),rs277913(1),rs277914(1),rs277915(1),rs277916(1),rs277917(1),rs277918(1),rs148187331(1),rs34183499(1),rs185731(1),rs277886(1),rs277885(1),rs201733280(1),rs34534987(1),rs277884(1),rs58539375(1),rs277883(1),rs12917728(1),rs4787694(1),rs277894(1),rs277895(1),rs277896(1),rs277897(1),rs277899(1),rs277900(1),rs277901(1),rs277902(1),rs277903(1),rs277904(1),rs277905(1),rs57249693(1),rs8055258(1),rs277890(1),rs277891(1),rs277892(1),rs182171(1),rs277893(1),rs202853(1),rs35311571(1),rs277887(1),rs277888(1),rs277889(1),rs6497813(1),rs8045935(1),rs7200088(1),rs12925518(1),rs13337201(1),rs7190821(1),rs8061811(1),rs200933276(1),rs202145191(1),rs4787305(1),rs4787306(1),rs8059022(1),rs12926774(1),rs12927100(1),rs11861030(1),rs8044867(1),rs4787307(1),rs12443914(1),rs12446641(1),rs140186811(1),rs4238912(1),rs4787308(1) |
| 10 | 1 | rs1147931 | 44922347 | 1.64E-05 | 8 | 0 | 3 | 0 | 0 | 5 | rs1779340(1),rs1779342(1),rs1147923(1),rs750011(1),rs1147930(1) |
| 5 | 1 | rs10474761 | 3204386 | 0.000017 | 15 | 0 | 0 | 0 | 0 | 15 | rs9986296(1),rs72733165(1),rs72733167(1),rs875854(1),rs2404272(1),rs875851(1),rs875852(1),rs875853(1),rs55913333(1),rs16871418(1),rs10041055(1),rs10035705(1),rs141732035(1),rs7709394(1),rs10475196(1) |
| 17 | 1 | rs35939580 | 62973078 | 1.85E-05 | 84 | 0 | 2 | 16 | 24 | 42 | rs35122942(1),rs11650325(1),rs35355477(1),rs7212449(1),rs11868185(1),rs62073261(1),rs35020254(1),rs59490819(1),rs58511951(1),rs59179879(1),rs58671384(1),rs59403188(1),rs12948418(1),rs12948710(1),rs35742188(1),rs62073271(1),rs62073272(1),rs34569554(1),rs62073275(1),rs17685439(1),rs4791250(1),rs4791249(1),rs3960393(1),rs35011716(1),rs12945457(1),rs200319728(1),rs201835220(1),rs12946305(1),rs28622424(1),rs67542101(1),rs67115810(1),rs62073277(1),rs34835781(1),rs36090413(1),rs35575637(1),rs62073280(1),rs62073281(1),rs62073282(1),rs62073283(1),rs62073284(1),rs35001236(1),rs62073285(1),rs67665996(1),rs2044178(1),rs12938589(1),rs12938922(1),rs12939726(1),rs12941507(1),rs35093417(1),rs12953318(1),rs9910274(1),rs1969175(1),rs12944772(1),rs28411155(1),rs35292793(1),rs7223152(1),rs34604706(1),rs7224520(1),rs34550853(1),rs3960369(1),rs12947222(1),rs12947730(1),rs34476326(1),rs7501452(1),rs8082406(1),rs4239089(1),rs12939956(1),rs12941130(1),rs77496416(1),rs12941207(1),rs111926566(1),rs12942189(1),rs62065481(1),rs2011307(1),rs150512389(1),rs8082708(1),rs62062475(1),rs6504271(1),rs11656396(1),rs142935501(1),rs77675516(1),rs8076716(1) |
| 7 | 1 | rs6950250 | 95853837 | 1.96E-05 | 17 | 0 | 0 | 8 | 4 | 5 | rs6961695(1),rs6465486(1),rs10230484(1),rs6465488(1),rs6979703(1),rs7804690(1),rs78813201(1),rs117635935(1),rs6954163(1),rs12535668(1),rs73235911(1),rs5885948(1),rs6465496(1),rs1986600(1),rs4307273(1),rs12704840(1),rs10234418(1) |
| 6 | 1 | rs4712864 | 24891756 | 1.98E-05 | 8 | 0 | 0 | 1 | 4 | 3 | rs7775096(1),rs4364477(1),rs12664127(1),rs9467340(1),rs6930916(1),rs9295635(1),rs34884243(1),rs990958(1) |
| 8 | 1 | rs55964566 | 81497393 | 2.13E-05 | 7 | 0 | 0 | 2 | 4 | 1 | rs62515091(1),rs2114470(1),rs17557173(1),rs11984997(1),rs11988829(1),rs17557250(1),rs11785691(1) |
| 6 | 1 | rs2757630 | 7561359 | 2.56E-05 | 4 | 0 | 0 | 1 | 1 | 2 | rs12198780(1),rs2757629(1),rs2757632(1),rs2842683(1) |
| 9 | 1 | rs199631776 | 22774473 | 2.56E-05 | 2 | 0 | 0 | 1 | 0 | 1 | rs6475682(1),rs59882713(1) |
| 10 | 1 | rs1991394 | 54086988 | 2.65E-05 | 30 | 0 | 0 | 1 | 16 | 13 | rs11001548(1),rs11001553(1),rs41281546(1),rs74711339(1),rs5784919(1),rs5784920(1),rs2288335(1),rs11001570(1),rs10824351(1),rs11001580(1),rs11001581(1),rs10762689(1),rs1590105(1),rs7910446(1),rs7073197(1),rs7081342(1),rs11001604(1),rs7083441(1),rs1991393(1),rs1991392(1),rs11001609(1),rs7097211(1),rs145689181(1),rs11001630(1),rs12354645(1),rs11001643(1),rs80252573(1),rs12356251(1),rs1149785(1),rs66594753(1) |
| 7 | 1 | rs11772117 | 1.38E+08 | 2.85E-05 | 25 | 0 | 0 | 0 | 12 | 13 | rs370275(1),rs397203(1),rs396918(1),rs60969(1),rs432187(1),rs431358(1),rs402486(1),rs402228(1),rs59362857(1),rs6953543(1),rs399486(1),rs398970(1),rs1643164(1),rs55742929(1),rs57370826(1),rs58541699(1),rs1318101(1),rs55654461(1),rs78557666(1),rs6966225(1),rs11769851(1),rs11770003(1),rs11764610(1),rs58293794(1),rs2352568(1) |
| 2 | 1 | rs11677946 | 2.01E+08 | 2.94E-05 | 29 | 0 | 1 | 3 | 23 | 2 | rs7556874(1),rs11677090(1),rs10931875(1),rs11695200(1),rs7561312(1),rs7578914(1),rs34142673(1),rs139790276(1),rs13015748(1),rs11686453(1),rs12473679(1),rs12473716(1),rs11694792(1),rs11689723(1),rs11673846(1),rs6723607(1),rs6752100(1),rs6739000(1),rs34476507(1),rs6711594(1),rs6759644(1),rs6710237(1),rs6743271(1),rs12693901(1),rs4353632(1),rs10931878(1),rs4519507(1),rs12693902(1) |
| 16 | 1 | rs2911319 | 62921503 | 2.96E-05 | 21 | 0 | 0 | 4 | 15 | 2 | rs34172980(1),rs1364242(1),rs1366539(1),rs2911316(1),rs2911317(1),rs2914480(1),rs2914481(1),rs2962426(1),rs2962427(1),rs11862522(1),rs2962428(1),rs2962430(1),rs1594043(1),rs55937634(1),rs79244623(1),rs2914485(1),rs2914486(1),rs2962454(1),rs7206281(1),rs2068788(1),rs201000144(1) |
| 3 | 1 | rs55728401 | 1.25E+08 | 0.000031 | 151 | 2 | 1 | 79 | 38 | 31 | rs4679380(1),rs62270333(1),rs56347530(1),rs56187117(1),rs10512647(1),rs62270354(1),rs62273088(1),rs62273089(1),rs62273095(1),rs4679171(1),rs12493779(1),rs116576854(1),rs79156008(1),rs139673169(1),rs115189231(1),rs140653507(1),rs115139378(1),rs114294026(1),rs12490338(1),rs12491438(1),rs115728900(1),rs4679401(1),rs74506060(1),rs56216031(1),rs56238866(1),rs115946997(1),rs116286187(1),rs201537662(1),rs59701842(1),rs200848987(1),rs4679404(1),rs12485301(1),rs2294053(1),rs2294051(1),rs199919013(1),rs200867674(1),rs113347928(1),rs56256275(1),rs9867731(1),rs34676495(1),rs55845046(1),rs9822616(1),rs11928504(1),rs75104708(1),rs12488615(1),rs201868655(1),rs114547355(1),rs200807540(1),rs7644750(1),rs12497659(1),rs12497729(1),rs12494422(1),rs60400336(1),rs55841185(1),rs768155(1),rs1374908(1),rs12486467(1),rs11920627(1),rs76748638(1),rs77361621(1),rs72979718(1),rs11916040(1),rs11920232(1),rs11916105(1),rs1971188(1),rs140056335(1),rs150325280(1),rs149521956(1),rs72979729(1),rs13080262(1),rs13080994(1),rs71325849(1),rs76478168(1),rs35077020(1),rs35898908(1),rs35429478(1),rs34341961(1),rs35601339(1),rs13066562(1),rs13089180(1),rs35535572(1),rs71325851(1),rs71325852(1),rs12490771(1),rs4679174(1),rs35364302(1),rs35246473(1),rs201940337(1),rs35329622(1),rs56264875(1),rs35215120(1),rs13072914(1),rs12490865(1),rs12491703(1),rs11926191(1),rs35231398(1),rs13064295(1),rs35904776(1),rs12496976(1),rs34494344(1),rs4679406(1),rs13100866(1),rs13080535(1),rs13058758(1),rs13074510(1),rs34856375(1),rs10934716(1),rs4679407(1),rs12495987(1),rs12486487(1),rs80050864(1),rs77362937(1),rs4679408(1),rs4679409(1),rs34074335(1),rs71325854(1),rs10934717(1),rs35290954(1),rs71629418(1),rs12490297(1),rs12490990(1),rs12487734(1),rs12487738(1),rs143275491(1),rs12492154(1),rs13086548(1),rs36114352(1),rs34321784(1),rs55981519(1),rs11916865(1),rs71325857(1),rs13059150(1),rs3829007(1),rs56022566(1),rs141127592(1),rs115237354(1),rs11928878(1),rs11921224(1),rs4679410(1),rs71325858(1),rs4679411(1),rs2922182(1),rs12493868(1),rs35470634(1),rs35725435(1),rs28583173(1),rs4632498(1),rs34536774(1) |
| 10 | 1 | rs1570925 | 14555086 | 3.11E-05 | 33 | 0 | 0 | 12 | 20 | 1 | rs10906685(1),rs139653674(1),rs1998862(1),rs7089824(1),rs34142361(1),rs8563(1),rs3780915(1),rs7910918(1),rs10906690(1),rs10906692(1),rs7087416(1),rs7079377(1),rs10906694(1),rs3829826(1),rs10906695(1),rs61577859(1),rs10906696(1),rs7897858(1),rs4543882(1),rs11259187(1),rs876655(1),rs876654(1),rs7092057(1),rs7096086(1),rs7074929(1),rs1571040(1),rs10906699(1),rs10796204(1),rs6602742(1),rs7910322(1),rs6602744(1),rs11259201(1),rs10906703(1) |
| 16 | 1 | rs8058900 | 85026218 | 3.12E-05 | 60 | 0 | 0 | 18 | 20 | 22 | rs62050769(1),rs113645132(1),rs8051926(1),rs3203781(1),rs3203780(1),rs9934780(1),rs72801590(1),rs112597421(1),rs6564089(1),rs62050771(1),rs28479301(1),rs62050773(1),rs28489867(1),rs146249896(1),rs62050774(1),rs12596035(1),rs9938580(1),rs62050807(1),rs8061350(1),rs11866158(1),rs9930594(1),rs9930457(1),rs9930873(1),rs11864051(1),rs9933798(1),rs60203572(1),rs9921417(1),rs35033855(1),rs9924112(1),rs9924345(1),rs9926604(1),rs62050811(1),rs9937746(1),rs28369286(1),rs9937920(1),rs9938089(1),rs9927377(1),rs9929372(1),rs9929818(1),rs62050812(1),rs61339076(1),rs60782040(1),rs59747951(1),rs62050815(1),rs9932752(1),rs9933020(1),rs9935407(1),rs9935350(1),rs9935369(1),rs139735514(1),rs1875249(1),rs1875248(1),rs1875247(1),rs142812022(1),rs11865871(1),rs9938595(1),rs11867115(1),rs77865015(1),rs12102442(1),rs9922798(1) |
| 6 | 1 | rs9397696 | 1.55E+08 | 3.14E-05 | 4 | 0 | 2 | 0 | 2 | 0 | rs9479791(1),rs9383695(1) |
| 8 | 1 | rs147898448 | 47709375 | 3.14E-05 | 379 | 43 | 24 | 65 | 212 | 35 | rs147450094(1),rs4535748(1),rs7824754(1),rs12675944(1),rs4385479(1),rs7814673(1),rs12056367(1),rs11780073(1),rs11782124(1),rs4377974(1),rs13439421(1),rs4372010(1),rs7845335(1),rs11782794(1),rs4873008(1),rs4354318(1),rs10093035(1),rs10093503(1),rs78622043(1),rs7009430(1),rs28418381(1),rs10112598(1),rs12677268(1),rs2974375(1),rs2974374(1),rs2974370(1),rs11136217(1),rs11136218(1),rs2949687(1),rs12679217(1),rs1917560(1),rs2949686(1),rs7824259(1),rs56307335(1),rs12546983(1),rs4872670(1),rs1852076(1),rs13274859(1),rs13276733(1),rs59483569(1),rs4873005(1),rs9792370(1),rs11783370(1),rs74980639(1),rs146905958(1),rs13264108(1),rs2883392(1),rs13252605(1),rs58246358(1),rs12548455(1),rs144881852(1),rs1917559(1),rs1917558(1),rs10096823(1),rs13261222(1),rs3920403(1),rs146411693(1),rs117764374(1),rs117875773(1),rs151179363(1),rs6558273(1),rs2354261(1),rs2354262(1),rs79166752(1),rs7837955(1),rs10090476(1),rs1852074(1),rs71239863(1),rs10090940(1),rs1404627(1),rs13279994(1),rs1404626(1),rs7011822(1),rs181209916(1),rs13270717(1),rs10109179(1),rs146789612(1),rs34502363(1),rs6989593(1),rs13269608(1),rs28375780(1),rs12548459(1),rs1568848(1),rs13250858(1),rs10107646(1),rs1474386(1),rs13264458(1),rs4265201(1),rs7821059(1),rs7013951(1),rs3946398(1),rs36088713(1),rs11136223(1),rs4440647(1),rs75005637(1),rs11136225(1),rs6999664(1),rs11776359(1),rs1976904(1),rs13268874(1),rs138190040(1),rs10099827(1),rs6558279(1),rs1917556(1),rs66602632(1),rs4872989(1),rs10097962(1),rs9644187(1),rs113918393(1),rs144572301(1),rs148458239(1),rs13269258(1),rs4872986(1),rs7003862(1),rs13271007(1),rs1917561(1),rs4872985(1),rs140302791(1),rs4872984(1),rs11136229(1),rs12677475(1),rs13279826(1),rs4288390(1),rs1852077(1),rs13281047(1),rs6558284(1),rs1319305(1),rs11778610(1),rs2049451(1),rs1903259(1),rs1852079(1),rs1852080(1),rs146574636(1),rs7015932(1),rs4872660(1),rs9650457(1),rs9650458(1),rs9650441(1),rs11136230(1),rs1852073(1),rs13267312(1),rs140497758(1),rs2354489(1),rs2354490(1),rs11136231(1),rs1599222(1),rs4872982(1),rs11136233(1),rs11136234(1),rs7839052(1),rs13252648(1),rs11136235(1),rs2199239(1),rs2199240(1),rs145308892(1),rs74590344(1),rs145659445(1),rs141178457(1),rs148560998(1),rs1466366(1),rs1824430(1),rs1460020(1),rs989574(1),rs1460019(1),rs10104861(1),rs10088257(1),rs1460025(1),rs1824431(1),rs1460024(1),rs11136239(1),rs7823867(1),rs71239875(1),rs79624574(1),rs4872977(1),rs12676828(1),rs11136240(1),rs4467944(1),rs12546311(1),rs1599223(1),rs2100746(1),rs6558286(1),rs1841284(1),rs13258349(1),rs13252450(1),rs1460023(1),rs10097997(1),rs113128602(1),rs147782142(1),rs1903258(1),rs13265672(1),rs7002674(1),rs12676212(1),rs12543892(1),rs1916184(1),rs13249850(1),rs12541640(1),rs13281323(1),rs13254429(1),rs1159441(1),rs11777235(1),rs11136243(1),rs11136244(1),rs11136245(1),rs10866902(1),rs12548844(1),rs990760(1),rs898375(1),rs74437201(1),rs13266367(1),rs1879963(1),rs1879964(1),rs6995094(1),rs3849804(1),rs1993666(1),rs7834644(1),rs4872653(1),rs2049273(1),rs2049272(1),rs13270926(1),rs74568957(1),rs10102469(1),rs7837235(1),rs7826304(1),rs2354491(1),rs11784424(1),rs4618703(1),rs4541942(1),rs7007218(1),rs7460927(1),rs1522871(1),rs11787342(1),rs1851527(1),rs1851526(1),rs12549862(1),rs6999676(1),rs11778972(1),rs75583623(1),rs4872971(1),rs4333613(1),rs147898793(1),rs34209667(1),rs12679043(1),rs7011899(1),rs4872969(1),rs1403380(1),rs6995483(1),rs35119286(1),rs6982077(1),rs6985895(1),rs6998350(1),rs11777999(1),rs76292164(1),rs867896(1),rs867895(1),rs13259304(1),rs13259305(1),rs4872965(1),rs4872964(1),rs4872963(1),rs1827125(1),rs1909445(1),rs11136100(1),rs6992844(1),rs10090014(1),rs13252458(1),rs11136102(1),rs1499304(1),rs7017649(1),rs7816200(1),rs10504055(1),rs9657320(1),rs7839671(1),rs6558186(1),rs7824137(1),rs6558187(1),rs6558188(1),rs4409407(1),rs6997678(1),rs2133482(1),rs2454605(1),rs1909447(1),rs2454604(1),rs11439530(1),rs2431085(1),rs2454603(1),rs74623138(1),rs77034009(1),rs190044576(1),rs7015418(1),rs2431084(1),rs2259705(1),rs1499302(1),rs2454590(1),rs1895158(1),rs421382(1),rs11339450(1),rs967627(1),rs967625(1),rs375582(1),rs416623(1),rs2431096(1),rs365196(1),rs3067758(1),rs1157231(1),rs1846507(1),rs450771(1),rs1499301(1),rs406597(1),rs449406(1),rs441846(1),rs425946(1),rs2454591(1) |
| 2 | 1 | rs10202078 | 37727116 | 3.19E-05 | 15 | 0 | 0 | 0 | 9 | 6 | rs7426369(1),rs72793794(1),rs2192941(1),rs62135570(1),rs6544086(1),rs2373111(1),rs62135573(1),rs35584558(1),rs55830576(1),rs10178620(1),rs71660669(1),rs62135577(1),rs201851405(1),rs9309012(1),rs114301176(1) |
| 7 | 1 | rs4288315 | 1.23E+08 | 3.22E-05 | 5 | 0 | 0 | 0 | 0 | 5 | rs76497037(1),rs77114620(1),rs76299478(1),rs79273327(1),rs17145405(1) |
| 16 | 1 | rs79044013 | 84984096 | 3.26E-05 | 4 | 0 | 0 | 0 | 3 | 1 | rs1532459(1),rs8049368(1),rs17189653(1),rs17189688(1) |
| 11 | 1 | rs17650551 | 1.07E+08 | 3.27E-05 | 5 | 0 | 0 | 5 | 0 | 0 | rs7484089(1),rs1793079(1),rs1793080(1),rs1793082(1),rs77763372(1) |
| 22 | 1 | rs13053888 | 34366372 | 3.34E-05 | 28 | 0 | 0 | 9 | 18 | 1 | rs9609893(1),rs13055754(1),rs16993343(1),rs16993351(1),rs8142678(1),rs8139175(1),rs7292884(1),rs13057320(1),rs13053564(1),rs13057177(1),rs71326532(1),rs13056533(1),rs13054228(1),rs13055187(1),rs13054995(1),rs4322936(1),rs36099916(1),rs13056918(1),rs66497569(1),rs7286472(1),rs35703411(1),rs13057010(1),rs202185466(1),rs13058205(1),rs34767181(1),rs13055678(1),rs13054151(1),rs394762(1) |
| 12 | 1 | rs7975048 | 1.28E+08 | 3.39E-05 | 30 | 0 | 0 | 0 | 7 | 23 | rs7295355(1),rs7307307(1),rs7295735(1),rs11059227(1),rs10744314(1),rs10773405(1),rs10773406(1),rs1845374(1),rs12306772(1),rs12316734(1),rs140693694(1),rs141703400(1),rs2046481(1),rs2046480(1),rs2046478(1),rs2046477(1),rs145840149(1),rs146094082(1),rs74788128(1),rs71446235(1),rs12317458(1),rs12318947(1),rs28859070(1),rs12310613(1),rs11059230(1),rs10773407(1),rs10847393(1),rs11059232(1),rs11059233(1),rs7975543(1) |
| 20 | 1 | rs73136137 | 51349009 | 3.52E-05 | 22 | 0 | 0 | 0 | 0 | 22 | rs73134194(1),rs73134202(1),rs17806568(1),rs60343149(1),rs59704948(1),rs58950409(1),rs4811389(1),rs4811391(1),rs73136122(1),rs73136125(1),rs61443382(1),rs17806622(1),rs73136138(1),rs4811393(1),rs35730111(1),rs13045046(1),rs12625208(1),rs73136169(1),rs1159479(1),rs12625956(1),rs73136180(1),rs73136183(1) |
| 20 | 1 | rs35116986 | 45092334 | 3.54E-05 | 37 | 13 | 0 | 7 | 6 | 11 | rs74656191(1),rs2297057(1),rs41307161(1),rs2274676(1),rs4810506(1),rs1076694(1),rs6094342(1),rs73911433(1),rs4809590(1),rs4810507(1),rs4810508(1),rs6094345(1),rs6094347(1),rs1000383(1),rs975102(1),rs6094350(1),rs58953827(1),rs6094353(1),rs60008268(1),rs636493(1),rs678628(1),rs652870(1),rs455900(1),rs467245(1) |
| 5 | 1 | rs7721856 | 26108316 | 3.74E-05 | 49 | 0 | 5 | 41 | 3 | 0 | rs35409952(1),rs12519594(1),rs4623117(1),rs13171433(1),rs143002649(1),rs4429811(1),rs34883514(1),rs12515569(1),rs12518194(1),rs4475231(1),rs5866752(1),rs7706375(1),rs13166776(1),rs13180185(1),rs4327572(1),rs34927491(1),rs34691439(1),rs36015794(1),rs62344899(1),rs12514153(1),rs12519759(1),rs62344902(1),rs11744808(1),rs34605936(1),rs12520213(1),rs34105128(1),rs4270662(1),rs59799623(1),rs10072518(1),rs1330647(1),rs7707114(1),rs10942156(1),rs10067646(1),rs13179944(1),rs12651738(1),rs13169398(1),rs13186094(1),rs13168003(1),rs62347789(1),rs13185640(1),rs2150178(1),rs2150177(1),rs2183463(1),rs6898042(1) |
| 14 | 1 | rs754415 | 1.05E+08 | 3.96E-05 | 18 | 2 | 2 | 1 | 13 | 0 | rs1770995(1),rs1770994(1),rs1744271(1),rs1770992(1),rs1770988(1),rs941949(1),rs1770987(1),rs1612493(1),rs941950(1),rs1744282(1),rs941951(1),rs941953(1),rs1770984(1),rs1744284(1) |
| 16 | 1 | rs28470926 | 19323261 | 4.15E-05 | 20 | 1 | 10 | 5 | 2 | 2 | rs1548448(1),rs28575340(1),rs79117596(1),rs13330097(1),rs9934966(1),rs79101603(1),rs79019710(1),rs79896548(1),rs7206613(1) |
| 7 | 1 | rs73043693 | 3315440 | 4.45E-05 | 92 | 1 | 14 | 19 | 55 | 3 | rs77310567(1),rs17133206(1),rs1880608(1),rs6945059(1),rs200792308(1),rs7799969(1),rs59365175(1),rs1525553(1),rs1525554(1),rs56142232(1),rs73044757(1),rs75356570(1),rs7780037(1),rs73044792(1),rs73044797(1),rs7799163(1),rs4326295(1),rs112263095(1),rs6955831(1),rs9691979(1),rs73046637(1),rs4343997(1),rs56143924(1),rs73288374(1),rs11312480(1),rs7779576(1),rs59604371(1),rs9969312(1),rs59719823(1),rs6462005(1),rs73046678(1),rs73672091(1),rs73672093(1),rs73046696(1),rs201284484(1),rs144094184(1),rs68100835(1),rs73048618(1),rs7811986(1),rs10636475(1),rs56806161(1),rs7781736(1),rs58713621(1),rs66819701(1),rs73675313(1),rs58608495(1),rs57893579(1),rs73292178(1),rs145606589(1),rs28633216(1),rs17133341(1),rs7788172(1),rs2341582(1),rs17133346(1),rs7801995(1),rs17133355(1),rs7807993(1),rs2204123(1),rs17840351(1),rs73036731(1),rs6963701(1),rs17133370(1),rs73036754(1),rs73036763(1),rs56853113(1),rs61264007(1),rs60192356(1),rs7785356(1),rs17133392(1),rs61452261(1),rs17133398(1),rs6958565(1),rs17133409(1),rs7802165(1),rs17133414(1),rs7804059(1),rs146598794(1) |
| 17 | 1 | rs9901183 | 49740054 | 4.48E-05 | 9 | 0 | 1 | 1 | 5 | 2 | rs2106329(1),rs2214015(1),rs886078(1),rs4794288(1),rs4794289(1),rs150352009(1),rs8066303(1),rs4794294(1) |
| 1 | 1 | rs76728099 | 2.44E+08 | 4.56E-05 | 24 | 0 | 0 | 5 | 19 | 0 | rs77031333(1),rs11807869(1),rs6659442(1),rs190842956(1),rs7548979(1),rs7546143(1),rs57756078(1),rs6658937(1),rs6684323(1),rs6659273(1),rs10927159(1),rs10927160(1),rs10927161(1),rs7552246(1),rs11809315(1),rs10927162(1),rs11810106(1),rs7519511(1),rs10927163(1),rs58781073(1),rs60269165(1),rs58284352(1),rs6677179(1),rs74153646(1) |
| 7 | 1 | rs357373 | 1.38E+08 | 4.64E-05 | 23 | 0 | 0 | 14 | 9 | 0 | rs357370(1),rs357374(1),rs357375(1),rs443184(1),rs407687(1),rs407702(1),rs410187(1),rs410156(1),rs424847(1),rs424197(1),rs11536612(1),rs1035329(1),rs690193(1),rs382122(1),rs385127(1),rs446384(1),rs141146946(1),rs357381(1),rs357382(1),rs151177697(1),rs449239(1),rs357454(1),rs357447(1) |
| 8 | 1 | rs1543994 | 46939842 | 4.77E-05 | 338 | 0 | 0 | 16 | 268 | 54 | rs4872565(1),rs11136181(1),rs11776913(1),rs4872742(1),rs12678983(1),rs12680749(1),rs61464547(1),rs4412384(1),rs76986324(1),rs79172773(1),rs36193867(1),rs11987901(1),rs13272513(1),rs4612356(1),rs4509329(1),rs13257202(1),rs11776629(1),rs11136210(1),rs11785812(1),rs13258137(1),rs117152191(1),rs4415330(1),rs4486213(1),rs11136213(1),rs11136214(1),rs12681258(1),rs13278440(1),rs1608733(1),rs4637846(1),rs144050885(1),rs7386448(1),rs1608734(1),rs4535746(1),rs13256139(1),rs13264613(1),rs8185743(1),rs1917435(1),rs13249362(1),rs12676202(1),rs9314399(1),rs13264469(1),rs11136242(1),rs7293738(1),rs4872561(1),rs4872560(1),rs10087124(1),rs11778237(1),rs1880509(1),rs1917437(1),rs12545614(1),rs7388412(1),rs12678280(1),rs11136246(1),rs11136247(1),rs11783264(1),rs10090166(1),rs4872732(1),rs4872731(1),rs2353198(1),rs10866903(1),rs11136249(1),rs11136096(1),rs7838878(1),rs1543993(1),rs4073624(1),rs3950391(1),rs869363(1),rs13253742(1),rs12547065(1),rs7836486(1),rs7386770(1),rs13256082(1),rs13249023(1),rs1357818(1),rs17061620(1),rs139024790(1),rs200239141(1),rs57318590(1),rs7008520(1),rs2037658(1),rs7014394(1),rs74805142(1),rs80199697(1),rs1880507(1),rs4265202(1),rs1880508(1),rs9644191(1),rs4242437(1),rs55763879(1),rs4540420(1),rs201200977(1),rs73576793(1),rs4872727(1),rs4133288(1),rs12543950(1),rs1917431(1),rs1917429(1),rs72638645(1),rs12544729(1),rs1917434(1),rs1880505(1),rs13276533(1),rs1917427(1),rs10216568(1),rs10216759(1),rs10216494(1),rs1917428(1),rs4349992(1),rs1608732(1),rs10093428(1),rs4486212(1),rs28847903(1),rs11782164(1),rs28868083(1),rs72638649(1),rs2204395(1),rs7816964(1),rs60128455(1),rs12334576(1),rs4475488(1),rs2353197(1),rs12544021(1),rs4872724(1),rs6558208(1),rs6558209(1),rs11136123(1),rs1589822(1),rs13267299(1),rs13267310(1),rs7008919(1),rs13262569(1),rs12678943(1),rs66877679(1),rs1524898(1),rs68150269(1),rs7005506(1),rs7016563(1),rs11136124(1),rs7010587(1),rs7819716(1),rs7003987(1),rs28374030(1),rs73562703(1),rs68056887(1),rs57629643(1),rs10094471(1),rs59972725(1),rs28873520(1),rs28885784(1),rs11988990(1),rs28769332(1),rs28823410(1),rs13267636(1),rs10102387(1),rs10441621(1),rs10441622(1),rs60060822(1),rs13261801(1),rs11779562(1),rs13255141(1),rs10113597(1),rs66998120(1),rs10112503(1),rs10087378(1),rs10105092(1),rs7000009(1),rs12679978(1),rs9657321(1),rs28597859(1),rs6988138(1),rs2177671(1),rs35144882(1),rs13272118(1),rs9644201(1),rs13275242(1),rs12543537(1),rs11136130(1),rs10099211(1),rs13254856(1),rs7018188(1),rs7018331(1),rs10866884(1),rs13253473(1),rs4872558(1),rs12680292(1),rs10087094(1),rs10110677(1),rs12680979(1),rs4872557(1),rs11136132(1),rs11136133(1),rs1404490(1),rs1404489(1),rs13257804(1),rs10095720(1),rs4872719(1),rs12545363(1),rs4872718(1),rs11136134(1),rs4872717(1),rs13263905(1),rs13261291(1),rs1880503(1),rs28462097(1),rs13277528(1),rs4872714(1),rs4872713(1),rs12680016(1),rs1587137(1),rs1603283(1),rs3905812(1),rs11136135(1),rs1908565(1),rs1580721(1),rs12676716(1),rs4415328(1),rs7293687(1),rs62503025(1),rs4872711(1),rs8188539(1),rs7293710(1),rs4872710(1),rs11775581(1),rs13266771(1),rs10108444(1),rs12676158(1),rs13250380(1),rs13269388(1),rs7293677(1),rs7293794(1),rs4872553(1),rs12548112(1),rs12549148(1),rs9650442(1),rs10866886(1),rs11136136(1),rs4872552(1),rs2353202(1),rs11136138(1),rs11136139(1),rs2101844(1),rs11136140(1),rs11775579(1),rs4872709(1),rs4872708(1),rs4872707(1),rs75065356(1),rs79695874(1),rs9657305(1),rs13274190(1),rs13274843(1),rs57246192(1),rs13254868(1),rs13269806(1),rs4872705(1),rs11136142(1),rs4285502(1),rs4873079(1),rs10866887(1),rs11136143(1),rs7815133(1),rs10095388(1),rs11136144(1),rs11784374(1),rs7828496(1),rs34111397(1),rs4326398(1),rs4873076(1),rs11136145(1),rs11136146(1),rs13252120(1),rs7838647(1),rs7814052(1),rs2353201(1),rs4873074(1),rs4873072(1),rs144294254(1),rs60438243(1),rs13279903(1),rs4872703(1),rs7293777(1),rs7293764(1),rs11136147(1),rs13264112(1),rs4873070(1),rs11784755(1),rs11783740(1),rs11136149(1),rs4873068(1),rs13281938(1),rs11136150(1),rs11136151(1),rs4872702(1),rs1115880(1),rs1115879(1),rs1115878(1),rs1115877(1),rs13260584(1),rs10109623(1),rs11775673(1),rs968737(1),rs76874989(1),rs11136152(1),rs12543341(1),rs11136153(1),rs4872699(1),rs11136154(1),rs4873064(1),rs12678186(1),rs4873063(1),rs4873062(1),rs11136155(1),rs4872698(1),rs4873061(1),rs7293702(1),rs4872697(1),rs11136156(1),rs2353710(1),rs10110817(1),rs1976301(1),rs6651412(1),rs6991309(1),rs138241724(1),rs7011027(1),rs359781(1),rs1115831(1),rs1826756(1),rs2353711(1),rs359782(1),rs359783(1),rs359784(1),rs7388087(1),rs6558220(1),rs4872695(1),rs4873058(1),rs1874739(1),rs1874741(1),rs12541172(1) |
| 19 | 1 | rs7255568 | 605985 | 4.99E-05 | 0 | 0 | 0 | 0 | 0 | 0 | NONE |
| 8 | 1 | rs1580725 | 47195566 | 5.09E-05 | 275 | 0 | 0 | 3 | 267 | 5 | rs11774289(1),rs11136160(1),rs359808(1),rs359807(1),rs359806(1),rs359804(1),rs1817922(1),rs13267355(1),rs60794102(1),rs200186958(1),rs359834(1),rs359832(1),rs359828(1),rs12680255(1),rs168608(1),rs359827(1),rs359826(1),rs7842677(1),rs7842684(1),rs9657314(1),rs1304121(1),rs383016(1),rs1603281(1),rs359779(1),rs35162311(1),rs4872691(1),rs187220(1),rs189642(1),rs359813(1),rs4872690(1),rs7818028(1),rs359789(1),rs187219(1),rs359790(1),rs359791(1),rs359839(1),rs11780820(1),rs2101843(1),rs1603678(1),rs4873055(1),rs2353713(1),rs1587136(1),rs61513203(1),rs13258025(1),rs11782803(1),rs11786288(1),rs13249208(1),rs359838(1),rs11136162(1),rs67713724(1),rs11136163(1),rs447622(1),rs12543826(1),rs12546708(1),rs359824(1),rs359823(1),rs359821(1),rs6983826(1),rs359818(1),rs7824372(1),rs359817(1),rs6558231(1),rs381810(1),rs359786(1),rs13263282(1),rs359785(1),rs359800(1),rs359795(1),rs74748413(1),rs145090604(1),rs12155598(1),rs8185869(1),rs359792(1),rs13259926(1),rs13275098(1),rs11136166(1),rs1603270(1),rs4872688(1),rs13269795(1),rs2883168(1),rs13251765(1),rs12677189(1),rs117342464(1),rs359803(1),rs36122365(1),rs139311424(1),rs199693320(1),rs359802(1),rs359801(1),rs28859097(1),rs1603681(1),rs12681706(1),rs11136168(1),rs4873049(1),rs138612432(1),rs7293731(1),rs28540082(1),rs28878592(1),rs8188527(1),rs11136169(1),rs11136170(1),rs59905796(1),rs11136171(1),rs57654913(1),rs11136173(1),rs11136174(1),rs11136175(1),rs10866892(1),rs4872685(1),rs13261015(1),rs11136177(1),rs9644226(1),rs67518180(1),rs4873048(1),rs13262123(1),rs59993817(1),rs10096202(1),rs7293707(1),rs8188587(1),rs1587300(1),rs10100386(1),rs73576452(1),rs10104360(1),rs10104111(1),rs13260835(1),rs13263476(1),rs12549513(1),rs12541564(1),rs9644228(1),rs11136180(1),rs12676739(1),rs12676760(1),rs66748528(1),rs57041609(1),rs13279971(1),rs7293770(1),rs13255014(1),rs8188553(1),rs4872684(1),rs56686265(1),rs4873044(1),rs13262190(1),rs13262208(1),rs13248644(1),rs13258842(1),rs12681777(1),rs12682576(1),rs7293734(1),rs72641018(1),rs12676929(1),rs58157367(1),rs12056389(1),rs12675922(1),rs13274345(1),rs4873042(1),rs2354250(1),rs34024841(1),rs9650453(1),rs28782280(1),rs13278259(1),rs13255919(1),rs11785893(1),rs11136184(1),rs11136185(1),rs11136186(1),rs2354252(1),rs11136187(1),rs12674611(1),rs13251019(1),rs72641026(1),rs8188556(1),rs11136189(1),rs11136190(1),rs11136191(1),rs12155834(1),rs12674573(1),rs13259505(1),rs13252675(1),rs8188545(1),rs58015860(1),rs4358810(1),rs76233168(1),rs34128219(1),rs56290118(1),rs13277532(1),rs12677841(1),rs34898368(1),rs4412383(1),rs4129529(1),rs4527883(1),rs66623956(1),rs12548509(1),rs12545668(1),rs6981359(1),rs72641040(1),rs75039284(1),rs61598047(1),rs4873034(1),rs61219162(1),rs28830521(1),rs13266213(1),rs11786875(1),rs4562340(1),rs35095995(1),rs13271437(1),rs4397418(1),rs8188552(1),rs13265574(1),rs58496044(1),rs8188612(1),rs10107186(1),rs4532605(1),rs4394407(1),rs8188616(1),rs4386988(1),rs10866897(1),rs4592045(1),rs11136195(1),rs11778665(1),rs4642664(1),rs7836179(1),rs67938400(1),rs7836208(1),rs10866898(1),rs12164153(1),rs10107488(1),rs4480128(1),rs4410918(1),rs11136196(1),rs4507776(1),rs71239848(1),rs11786820(1),rs13263368(1),rs28836814(1),rs12550279(1),rs66925385(1),rs12056732(1),rs12056324(1),rs4873019(1),rs4327873(1),rs28832003(1),rs4590452(1),rs4584152(1),rs4487790(1),rs34207792(1),rs4276700(1),rs28886351(1),rs4469468(1),rs12550624(1),rs113989769(1),rs9644244(1),rs12546517(1),rs7459945(1),rs4588870(1),rs10108683(1),rs7820226(1),rs28788199(1),rs28893882(1),rs4631476(1),rs4311664(1),rs71239851(1),rs4304338(1),rs13262229(1),rs4255150(1),rs4425769(1),rs4289829(1),rs28792470(1),rs4275237(1),rs4620298(1),rs7820562(1),rs4434635(1),rs68190808(1),rs4291283(1),rs10099582(1),rs11136209(1) |
| 8 | 1 | rs10956244 | 90744409 | 5.55E-05 | 82 | 0 | 21 | 45 | 13 | 3 | rs216986(1),rs160445(1),rs216990(1),rs2088198(1),rs218892(1),rs10956226(1),rs2132348(1),rs218920(1),rs10447970(1),rs7828553(1),rs1603288(1),rs218949(1),rs218898(1),rs13282591(1),rs7815039(1),rs10956243(1),rs12156013(1),rs13254219(1),rs218935(1),rs218938(1),rs13276910(1),rs425721(1),rs150462066(1),rs39760(1),rs426779(1),rs43133(1),rs39501(1),rs390993(1),rs428484(1),rs39502(1),rs42479(1),rs39762(1),rs39763(1),rs39764(1),rs5893111(1),rs36010754(1),rs40378(1),rs39507(1),rs39508(1),rs39765(1),rs39510(1),rs40454(1),rs40379(1),rs398701(1),rs411310(1),rs42343(1),rs434264(1),rs34197977(1),rs39766(1),rs40635(1),rs42480(1),rs450332(1),rs39511(1),rs406680(1),rs76826973(1),rs397540(1),rs39514(1),rs392827(1),rs403567(1),rs39770(1),rs400077(1) |
| 3 | 1 | rs12493889 | 15432014 | 5.65E-05 | 1 | 0 | 0 | 0 | 0 | 1 | rs58663530(1) |
| 3 | 1 | rs34919709 | 1.86E+08 | 5.68E-05 | 2 | 0 | 0 | 0 | 1 | 1 | rs6803648(1),rs9844679(1) |
| 7 | 1 | rs56212935 | 3310841 | 5.81E-05 | 6 | 0 | 0 | 1 | 5 | 0 | rs62441382(1),rs62441384(1),rs17738963(1),rs2049477(1),rs4719881(1),rs10228086(1) |
| 9 | 1 | rs72718641 | 29939858 | 5.93E-05 | 14 | 0 | 0 | 13 | 1 | 0 | rs34217620(1),rs10813204(1),rs200106480(1),rs12237548(1),rs6476178(1),rs7865798(1),rs7020336(1),rs7020357(1),rs10969474(1),rs7856017(1),rs10733444(1),rs4425841(1),rs10969479(1),rs10969480(1) |
| 6 | 1 | rs75563712 | 81951005 | 5.96E-05 | 3 | 0 | 0 | 1 | 1 | 1 | rs74456584(1),rs74463975(1),rs72903128(1) |
| 5 | 1 | rs2121152 | 1.43E+08 | 6.06E-05 | 84 | 0 | 3 | 53 | 24 | 4 | rs10477211(1),rs4912910(1),rs4912911(1),rs17100289(1),rs12655166(1),rs17302697(1),rs6580277(1),rs146462216(1),rs11741656(1),rs11739465(1),rs72802828(1),rs6580279(1),rs6874751(1),rs4501370(1),rs6580280(1),rs7736633(1),rs11437212(1),rs7700825(1),rs7709304(1),rs7705497(1),rs2895176(1),rs6580283(1),rs17341284(1),rs1962496(1),rs72804709(1),rs17401215(1),rs11749664(1),rs72804710(1),rs11743688(1),rs11740944(1),rs17341964(1),rs17342202(1),rs12187686(1),rs12188358(1),rs12187918(1),rs72804717(1),rs12187799(1),rs12186574(1),rs72804720(1),rs72804721(1),rs72804722(1),rs72804724(1),rs72804725(1),rs149478280(1),rs72804728(1),rs140159599(1),rs17342841(1),rs72804730(1),rs201687528(1),rs12186751(1),rs147358282(1),rs17402308(1),rs55830434(1),rs72804735(1),rs72804737(1),rs72804738(1),rs72804740(1),rs72804742(1),rs17402406(1),rs72804747(1),rs150006701(1),rs72804748(1),rs34022217(1),rs61640029(1),rs56073594(1),rs55912938(1),rs17343140(1),rs17343168(1),rs55837754(1),rs72804755(1),rs72804756(1),rs72806716(1),rs72806717(1),rs72806718(1),rs17343202(1),rs17402664(1),rs74343164(1),rs72806724(1),rs17343518(1),rs72806729(1),rs72806731(1) |
| 18 | 1 | rs72940081 | 64355130 | 6.12E-05 | 70 | 9 | 5 | 2 | 49 | 5 | rs17076458(1),rs1941732(1),rs72936294(1),rs72936296(1),rs72936301(1),rs487514(1),rs17076471(1),rs142199013(1),rs72938429(1),rs72938445(1),rs11872096(1),rs72938471(1),rs72938483(1),rs2040209(1),rs117246129(1),rs72938493(1),rs72938496(1),rs2027695(1),rs17076516(1),rs72940004(1),rs72940006(1),rs72940007(1),rs41511945(1),rs72940012(1),rs72940016(1),rs72940017(1),rs41451347(1),rs148912455(1),rs72940023(1),rs17076530(1),rs72940028(1),rs72940033(1),rs17076535(1),rs17076547(1),rs12605352(1),rs17076548(1),rs56308216(1),rs17076550(1),rs2040214(1),rs1970661(1),rs72940053(1),rs117894121(1),rs72940077(1),rs72940090(1),rs55960889(1),rs72942026(1),rs72942050(1),rs56343932(1),rs72943993(1),rs149280252(1),rs117436935(1),rs11660773(1),rs12605988(1),rs56410059(1),rs1469334(1),rs72948424(1) |
| 3 | 1 | rs35478621 | 50980168 | 6.31E-05 | 14 | 0 | 3 | 5 | 6 | 0 | rs73072483(1),rs62260152(1),rs73072493(1),rs62258671(1),rs11921930(1),rs11928389(1),rs62257823(1),rs116768029(1),rs62260377(1),rs73087292(1),rs11926662(1) |
| 10 | 1 | rs12256137 | 53974269 | 6.66E-05 | 1 | 0 | 1 | 0 | 0 | 0 | NONE |
| 4 | 1 | rs1848108 | 1.17E+08 | 6.69E-05 | 23 | 0 | 0 | 0 | 21 | 2 | rs6858305(1),rs6835649(1),rs1911182(1),rs13148752(1),rs13124561(1),rs6842972(1),rs1506732(1),rs62312435(1),rs7696097(1),rs7677143(1),rs13104076(1),rs13131847(1),rs144900590(1),rs1588040(1),rs7435625(1),rs13133121(1),rs7692660(1),rs2389176(1),rs2174665(1),rs2174666(1),rs2135572(1),rs1605303(1),rs62312436(1) |
| 16 | 1 | rs72794582 | 77118312 | 0.000068 | 0 | 0 | 0 | 0 | 0 | 0 | NONE |
| 11 | 1 | rs10891576 | 1.14E+08 | 6.82E-05 | 65 | 0 | 33 | 27 | 5 | 0 | rs10789950(1),rs73004036(1),rs200842278(1),rs1396807(1),rs7107799(1),rs1848703(1),rs2016102(1),rs10789954(1),rs7102991(1),rs10789956(1),rs7933657(1),rs4938035(1),rs11601435(1),rs7930871(1),rs2063302(1),rs1155104(1),rs6589393(1),rs7938346(1),rs4245156(1),rs7932415(1),rs73007952(1),rs73007954(1),rs7927569(1),rs73007957(1),rs7102791(1),rs11214716(1),rs7105512(1),rs10891592(1),rs11822222(1),rs11214725(1),rs2428022(1),rs11606284(1) |
| 14 | 1 | rs193548 | 72658681 | 7.06E-05 | 29 | 1 | 19 | 7 | 1 | 1 | rs149686(1),rs149685(1),rs149684(1),rs149682(1),rs149678(1),rs149673(1),rs149653(1),rs193547(1),rs193545(1) |
| 11 | 1 | rs7110917 | 1.06E+08 | 7.11E-05 | 16 | 0 | 0 | 6 | 9 | 1 | rs34314262(1),rs10895949(1),rs10895950(1),rs10895951(1),rs1553936(1),rs72394468(1),rs10791808(1),rs113941862(1),rs4755150(1),rs4755151(1),rs1849356(1),rs2102599(1),rs11227029(1),rs34641737(1),rs1512433(1),rs11227030(1) |
| 9 | 1 | rs74730961 | 8408346 | 7.17E-05 | 2 | 1 | 0 | 1 | 0 | 0 | rs58907783(1) |
| 21 | 1 | rs28735609 | 46075986 | 7.24E-05 | 45 | 0 | 1 | 16 | 21 | 7 | rs13051885(1),rs2838597(1),rs2838612(1),rs11088954(1),rs2070574(1),rs13046341(1),rs12626215(1),rs12483360(1),rs138351603(1),rs2838613(1),rs13049382(1),rs13052189(1),rs13052715(1),rs13048478(1),rs12626853(1),rs2838622(1),rs2329844(1),rs2329845(1),rs8130076(1),rs9984686(1),rs10854464(1),rs11911323(1),rs13046471(1),rs11700616(1),rs926194(1),rs9967974(1),rs8126811(1),rs8129089(1),rs12627135(1),rs7280674(1),rs9968008(1),rs13048816(1),rs11088958(1),rs13052999(1),rs7281329(1),rs7281653(1),rs1883042(1),rs2838621(1),rs145463303(1),rs2838635(1),rs8131699(1),rs6518201(1),rs6518202(1),rs2876986(1) |
| 19 | 1 | rs410029 | 46931157 | 7.56E-05 | 14 | 0 | 0 | 0 | 13 | 1 | rs77221049(1),rs10561854(1),rs7246254(1),rs7246988(1),rs113120302(1),rs11670219(1),rs11666050(1),rs11666031(1),rs201769270(1),rs76068798(1),rs141801749(1),rs7250259(1),rs6509269(1),rs366743(1) |
| 18 | 1 | rs12956183 | 8473809 | 7.79E-05 | 10 | 0 | 0 | 3 | 7 | 0 | rs8088373(1),rs3915828(1),rs8086049(1),rs898201(1),rs4797316(1),rs9948975(1),rs12455648(1),rs11661265(1),rs8097699(1),rs10775441(1) |
| 13 | 1 | rs73154241 | 23089113 | 7.79E-05 | 9 | 5 | 2 | 1 | 1 | 0 | rs73154246(1),rs200662036(1) |
| 1 | 1 | rs12083062 | 21937317 | 8.34E-05 | 0 | 0 | 0 | 0 | 0 | 0 | NONE |
| 4 | 1 | rs114494793 | 1.55E+08 | 0.000084 | 86 | 0 | 0 | 32 | 53 | 1 | rs56252981(1),rs148085779(1),rs114984471(1),rs142086535(1),rs115559096(1),rs116029479(1),rs74321456(1),rs2130704(1),rs114716991(1),rs139328121(1),rs79546836(1),rs80135673(1),rs114148099(1),rs114500090(1),rs79006272(1),rs7683566(1),rs116619619(1),rs1388085(1),rs7674315(1),rs114399087(1),rs116218035(1),rs4696206(1),rs10049695(1),rs79535970(1),rs13109747(1),rs140019361(1),rs74430037(1),rs12500437(1),rs6535994(1),rs1388084(1),rs74923470(1),rs13131908(1),rs9637650(1),rs2404705(1),rs2130712(1),rs1388082(1),rs2130711(1),rs76750997(1),rs75602216(1),rs72966161(1),rs77786356(1),rs142537432(1),rs115207965(1),rs189730146(1),rs7688597(1),rs6535998(1),rs76952361(1),rs114149846(1),rs77162727(1),rs80048317(1),rs77338040(1),rs75253416(1),rs10015880(1),rs79873491(1),rs116219683(1),rs75547445(1),rs79950229(1),rs115417965(1),rs80291273(1),rs199826672(1),rs75194430(1),rs76596573(1),rs78518210(1),rs199679639(1),rs114767542(1),rs77982749(1),rs73854730(1),rs201394308(1),rs115965983(1),rs116242556(1),rs78012549(1),rs80217634(1),rs114964272(1),rs76835816(1),rs79410835(1),rs73854735(1),rs114203084(1),rs114131286(1),rs56155318(1),rs77693626(1),rs73854737(1),rs28423376(1),rs10007868(1),rs10019687(1),rs6839125(1),rs6536005(1) |
| 3 | 1 | rs13322136 | 1.51E+08 | 8.52E-05 | 2 | 0 | 0 | 1 | 0 | 1 | rs9834244(1),rs10222538(1) |
| 4 | 1 | rs2798289 | 3047537 | 8.58E-05 | 41 | 0 | 3 | 25 | 13 | 0 | rs2157097(1),rs732859(1),rs2857841(1),rs2798298(1),rs2857839(1),rs1008210(1),rs1557213(1),rs2187695(1),rs2187694(1),rs1801058(1),rs2071689(1),rs2071688(1),rs2798303(1),rs2857854(1),rs2857853(1),rs2857852(1),rs2857849(1),rs2471347(1),rs3021126(1),rs2211474(1),rs2798285(1),rs2798286(1),rs2857847(1),rs2857846(1),rs2857843(1),rs1263308(1),rs1263309(1),rs1313766(1),rs1313767(1),rs1313768(1),rs1313769(1),rs1313770(1),rs1313772(1),rs1313773(1),rs1313774(1),rs2471334(1),rs2798296(1),rs2857936(1) |
| 2 | 1 | rs55761706 | 1.18E+08 | 8.61E-05 | 25 | 0 | 5 | 8 | 11 | 1 | rs11676498(1),rs144159480(1),rs1544828(1),rs2010568(1),rs35808110(1),rs5833717(1),rs62192727(1),rs13022184(1),rs7605802(1),rs2113512(1),rs17047250(1),rs12474279(1),rs17047255(1),rs1477450(1),rs11687807(1),rs11677210(1),rs34080169(1),rs991878(1),rs999497(1),rs933758(1) |
| 8 | 1 | rs7005752 | 68969350 | 8.62E-05 | 22 | 0 | 0 | 3 | 10 | 9 | rs6991787(1),rs56068997(1),rs60207976(1),rs920004(1),rs72660852(1),rs1434769(1),rs1434770(1),rs6995885(1),rs11443850(1),rs62520745(1),rs58981073(1),rs7831350(1),rs7009725(1),rs7009954(1),rs7009963(1),rs7010514(1),rs1897874(1),rs1897875(1),rs1897876(1),rs6993547(1),rs17445916(1),rs17445951(1) |
| 16 | 1 | rs8050553 | 17213783 | 8.71E-05 | 8 | 1 | 2 | 1 | 4 | 0 | rs11646184(1),rs12927688(1),rs11647237(1),rs12927122(1),rs56174168(1) |
| 15 | 1 | rs75460488 | 54524228 | 8.83E-05 | 52 | 0 | 0 | 5 | 47 | 0 | rs139352674(1),rs16974322(1),rs73409976(1),rs73409977(1),rs185425027(1),rs60183354(1),rs10851559(1),rs11634827(1),rs56218870(1),rs60148245(1),rs58743547(1),rs201991137(1),rs201713681(1),rs7163335(1),rs8030340(1),rs113782619(1),rs77969781(1),rs11635830(1),rs75708351(1),rs7178272(1),rs8023764(1),rs80081229(1),rs74013510(1),rs59881567(1),rs16974341(1),rs12161946(1),rs73411912(1),rs78442412(1),rs28410351(1),rs144989804(1),rs28676923(1),rs16974346(1),rs16974347(1),rs16974350(1),rs16974352(1),rs28550623(1),rs28362165(1),rs16974354(1),rs4144948(1),rs73411926(1),rs16974357(1),rs74013519(1),rs28641844(1),rs28494922(1),rs28737427(1),rs73411939(1),rs112986203(1),rs73411949(1),rs78785995(1),rs199605451(1),rs8037101(1),rs145791690(1) |
| 7 | 1 | rs6467767 | 1.38E+08 | 8.85E-05 | 5 | 0 | 0 | 3 | 1 | 1 | rs10238368(1),rs6467766(1),rs35834887(1),rs35916048(1),rs28464983(1) |
| 7 | 1 | rs17644994 | 17219869 | 0.000089 | 3 | 0 | 0 | 2 | 1 | 0 | rs59291726(1),rs77105779(1),rs80264836(1) |
| 16 | 1 | rs1030870 | 55515593 | 8.96E-05 | 38 | 3 | 6 | 15 | 14 | 0 | rs1030869(1),rs17859859(1),rs8055959(1),rs1030868(1),rs1477017(1),rs17301608(1),rs17859882(1),rs11646643(1),rs1132896(1),rs12934241(1),rs9302671(1),rs2241145(1),rs9928731(1),rs77946774(1),rs17859930(1),rs12919779(1),rs12919236(1),rs12923011(1),rs11640428(1),rs2287074(1),rs1992116(1),rs1992115(1),rs1946773(1),rs17859958(1),rs9923164(1),rs9923304(1),rs67969010(1),rs9936955(1),rs9939185(1) |
| 16 | 1 | rs4888865 | 78877418 | 9.01E-05 | 27 | 0 | 0 | 10 | 17 | 0 | rs7194133(1),rs7194700(1),rs7405423(1),rs9922613(1),rs6420411(1),rs1543296(1),rs6564608(1),rs7498176(1),rs55787116(1),rs7501409(1),rs12447303(1),rs7190122(1),rs7200092(1),rs4145518(1),rs11150107(1),rs11150108(1),rs6564611(1),rs7404138(1),rs11865833(1),rs12935055(1),rs4888867(1),rs4888868(1),rs4888869(1),rs60123013(1),rs9934393(1),rs7195996(1),rs11643146(1) |
| 2 | 1 | rs2110924 | 40357241 | 9.07E-05 | 40 | 0 | 9 | 29 | 2 | 0 | rs17025108(1),rs13022017(1),rs9309051(1),rs7586346(1),rs888073(1),rs2373793(1),rs759444(1),rs12712682(1),rs2110925(1),rs2160364(1),rs2110923(1),rs5830604(1),rs6739058(1),rs10208777(1),rs17025221(1),rs10205502(1),rs985991(1),rs11692455(1),rs13425134(1),rs414648(1),rs414720(1),rs375357(1),rs71404279(1),rs507705(1),rs435981(1),rs453970(1),rs435403(1),rs452369(1),rs429602(1),rs423573(1),rs445972(1) |
| 21 | 1 | rs66500736 | 42010435 | 9.16E-05 | 21 | 0 | 12 | 4 | 4 | 1 | rs13051356(1),rs34651383(1),rs13049148(1),rs12626937(1),rs13050930(1),rs35232284(1),rs13048660(1),rs34783617(1),rs1812236(1) |
| 5 | 1 | rs78907823 | 1.59E+08 | 9.31E-05 | 6 | 0 | 4 | 0 | 2 | 0 | rs56251777(1),rs112053124(1) |
| 3 | 1 | rs1603981 | 25184956 | 9.79E-05 | 24 | 0 | 10 | 11 | 3 | 0 | rs6765032(1),rs9310772(1),rs7620023(1),rs28534915(1),rs144626912(1),rs904593(1),rs2043620(1),rs2043619(1),rs2363595(1),rs2885836(1),rs4258924(1),rs6550953(1),rs6796899(1),rs978142(1) |

Supplementary Table 3: DAVID annotation clustering

| **Annotation Cluster 1** | **Enrichment Score: 2.132647231964535** |  |  |  |  |  |  |  |  |  |  |  |
| --- | --- | --- | --- | --- | --- | --- | --- | --- | --- | --- | --- | --- |
| **Category** | **Term** | **Count** | **%** | **PValue** | **Genes** | **List Total** | **Pop Hits** | **Pop Total** | **Fold Enrichment** | **Bonferroni** | **Benjamini** | **FDR** |
| GOTERM_CC_DIRECT | GO:0030425~dendrite | 7 | 11.86441 | 1.56E-04 | DSCAM, TRIM3, HTT, OPRM1, SLC8A1, HCN2, RAP1GAP | 39 | 448 | 20624 | 8.262821 | 0.017273 | 0.017422 | 0.017422 |
| GOTERM_CC_DIRECT | GO:0005769~early endosome | 4 | 6.779661 | 0.019413 | SNX4, TRIM3, HTT, RAP1GAP | 39 | 311 | 20624 | 6.80155 | 0.88871 | 0.512713 | 0.512713 |
| UP_KW_CELLULAR_COMPONENT | KW-0967~Endosome | 4 | 6.779661 | 0.132461 | SNX4, TRIM3, HTT, OPRM1 | 35 | 661 | 17708 | 3.061681 | 0.897051 | 0.529846 | 0.529846 |
|  |  |  |  |  |  |  |  |  |  |  |  |  |
| **Annotation Cluster 2** | **Enrichment Score: 0.8019330936053252** |  |  |  |  |  |  |  |  |  |  |  |
| **Category** | **Term** | **Count** | **%** | **PValue** | **Genes** | **List Total** | **Pop Hits** | **Pop Total** | **Fold Enrichment** | **Bonferroni** | **Benjamini** | **FDR** |
| GOTERM_CC_DIRECT | GO:0030425~dendrite | 7 | 11.86441 | 1.56E-04 | DSCAM, TRIM3, HTT, OPRM1, SLC8A1, HCN2, RAP1GAP | 39 | 448 | 20624 | 8.262821 | 0.017273 | 0.017422 | 0.017422 |
| GOTERM_CC_DIRECT | GO:0030424~axon | 6 | 10.16949 | 4.93E-04 | DSCAM, HTT, OPRM1, SLC8A1, HCN2, RAP1GAP | 39 | 360 | 20624 | 8.813675 | 0.0537 | 0.027591 | 0.027591 |
| GOTERM_CC_DIRECT | GO:0043025~neuronal cell body | 3 | 5.084746 | 0.14645 | DSCAM, SLC8A1, RAP1GAP | 39 | 367 | 20624 | 4.322783 | 1 | 1 | 1 |
| GOTERM_CC_DIRECT | GO:0005887~integral component of plasma membrane | 5 | 8.474576 | 0.271793 | PTPRD, DSCAM, OPRM1, SLC8A1, HCN2 | 39 | 1438 | 20624 | 1.838736 | 1 | 1 | 1 |
| UP_SEQ_FEATURE | CARBOHYD:N-linked (GlcNAc...) asparagine | 11 | 18.64407 | 0.372088 | PTPRD, HPX, DSCAM, DCHS2, MMP2, XYLT1, TSPEAR, OPRM1, SLC8A1, HCN2, CLEC19A | 42 | 4375 | 20543 | 1.229785 | 1 | 1 | 1 |
| UP_KW_PTM | KW-0325~Glycoprotein | 11 | 18.64407 | 0.529112 | PTPRD, HPX, DSCAM, DCHS2, MMP2, XYLT1, TSPEAR, OPRM1, SLC8A1, HCN2, CLEC19A | 30 | 4740 | 14111 | 1.091568 | 0.999881 | 1 | 1 |
| UP_SEQ_FEATURE | TOPO_DOM:Cytoplasmic | 8 | 13.55932 | 0.666273 | PTPRD, DSCAM, DCHS2, XYLT1, ZDHHC7, OPRM1, SLC8A1, HCN2 | 42 | 3837 | 20543 | 1.019795 | 1 | 1 | 1 |
| UP_SEQ_FEATURE | TOPO_DOM:Extracellular | 6 | 10.16949 | 0.717581 | PTPRD, DSCAM, DCHS2, OPRM1, SLC8A1, HCN2 | 42 | 2941 | 20543 | 0.997863 | 1 | 1 | 1 |
| UP_SEQ_FEATURE | TRANSMEM:Helical | 8 | 13.55932 | 0.939428 | PTPRD, DSCAM, DCHS2, XYLT1, PWWP2A, ZDHHC7, OPRM1, SLC8A1 | 42 | 5374 | 20543 | 0.728127 | 1 | 1 | 1 |
| GOTERM_CC_DIRECT | GO:0016021~integral component of membrane | 7 | 11.86441 | 0.956145 | PTPRD, DCHS2, XYLT1, PWWP2A, ZDHHC7, OPRM1, SLC8A1 | 39 | 5394 | 20624 | 0.686271 | 1 | 1 | 1 |
| UP_KW_DOMAIN | KW-1133~Transmembrane helix | 10 | 16.94915 | 0.958812 | PTPRD, DSCAM, DCHS2, XYLT1, PWWP2A, ZDHHC7, OPRM1, SLC8A1, HCN2, SLC25A13 | 34 | 5844 | 14504 | 0.729959 | 1 | 1 | 1 |
| UP_KW_DOMAIN | KW-0812~Transmembrane | 10 | 16.94915 | 0.962897 | PTPRD, DSCAM, DCHS2, XYLT1, PWWP2A, ZDHHC7, OPRM1, SLC8A1, HCN2, SLC25A13 | 34 | 5905 | 14504 | 0.722419 | 1 | 1 | 1 |
|  |  |  |  |  |  |  |  |  |  |  |  |  |
| **Annotation Cluster 3** | **Enrichment Score: 0.5569222708943227** |  |  |  |  |  |  |  |  |  |  |  |
| **Category** | **Term** | **Count** | **%** | **PValue** | **Genes** | **List Total** | **Pop Hits** | **Pop Total** | **Fold Enrichment** | **Bonferroni** | **Benjamini** | **FDR** |
| GOTERM_CC_DIRECT | GO:0005794~Golgi apparatus | 6 | 10.16949 | 0.057498 | WWOX, TRIM3, HTT, ZDHHC7, OPRM1, PRKG1 | 39 | 1145 | 20624 | 2.771112 | 0.998683 | 0.829006 | 0.829006 |
| UP_KW_PTM | KW-0449~Lipoprotein | 3 | 5.084746 | 0.582687 | HTT, ZDHHC7, OPRM1 | 30 | 937 | 14111 | 1.505977 | 0.999972 | 1 | 1 |
| GOTERM_CC_DIRECT | GO:0005783~endoplasmic reticulum | 3 | 5.084746 | 0.637005 | HTT, ZDHHC7, OPRM1 | 39 | 1157 | 20624 | 1.371185 | 1 | 1 | 1 |
|  |  |  |  |  |  |  |  |  |  |  |  |  |
| **Annotation Cluster 4** | **Enrichment Score: 0.2572622033861186** |  |  |  |  |  |  |  |  |  |  |  |
| **Category** | **Term** | **Count** | **%** | **PValue** | **Genes** | **List Total** | **Pop Hits** | **Pop Total** | **Fold Enrichment** | **Bonferroni** | **Benjamini** | **FDR** |
| UP_SEQ_FEATURE | CARBOHYD:N-linked (GlcNAc...) asparagine | 11 | 18.64407 | 0.372088 | PTPRD, HPX, DSCAM, DCHS2, MMP2, XYLT1, TSPEAR, OPRM1, SLC8A1, HCN2, CLEC19A | 42 | 4375 | 20543 | 1.229785 | 1 | 1 | 1 |
| UP_KW_CELLULAR_COMPONENT | KW-0964~Secreted | 6 | 10.16949 | 0.396774 | HPX, DSCAM, MMP2, XYLT1, TSPEAR, CLEC19A | 35 | 2148 | 17708 | 1.413248 | 0.999693 | 0.793549 | 0.793549 |
| UP_KW_PTM | KW-0325~Glycoprotein | 11 | 18.64407 | 0.529112 | PTPRD, HPX, DSCAM, DCHS2, MMP2, XYLT1, TSPEAR, OPRM1, SLC8A1, HCN2, CLEC19A | 30 | 4740 | 14111 | 1.091568 | 0.999881 | 1 | 1 |
| UP_KW_DOMAIN | KW-0732~Signal | 11 | 18.64407 | 0.554411 | PTPRD, HPX, CA10, DSCAM, MMP2, TRIM3, TSPEAR, SMARCA2, SLC8A1, FTCDNL1, CLEC19A | 34 | 4363 | 14504 | 1.075515 | 0.999973 | 1 | 1 |
| GOTERM_CC_DIRECT | GO:0005576~extracellular region | 5 | 8.474576 | 0.582573 | HPX, DSCAM, MMP2, TSPEAR, CLEC19A | 39 | 2184 | 20624 | 1.21067 | 1 | 1 | 1 |
| UP_KW_PTM | KW-1015~Disulfide bond | 8 | 13.55932 | 0.70466 | PTPRD, HPX, DSCAM, MMP2, XYLT1, OPRM1, PRKG1, CLEC19A | 30 | 3816 | 14111 | 0.986094 | 1 | 1 | 1 |
| GOTERM_CC_DIRECT | GO:0005615~extracellular space | 3 | 5.084746 | 0.889746 | HPX, MMP2, XYLT1 | 39 | 1970 | 20624 | 0.80531 | 1 | 1 | 1 |
|  |  |  |  |  |  |  |  |  |  |  |  |  |
| **Annotation Cluster 5** | **Enrichment Score: 0.23488251005519253** |  |  |  |  |  |  |  |  |  |  |  |
| **Category** | **Term** | **Count** | **%** | **PValue** | **Genes** | **List Total** | **Pop Hits** | **Pop Total** | **Fold Enrichment** | **Bonferroni** | **Benjamini** | **FDR** |
| GOTERM_BP_DIRECT | GO:0006915~apoptotic process | 4 | 6.779661 | 0.111867 | WWOX, HTT, RARB, AHR | 38 | 616 | 19414 | 3.317498 | 1 | 1 | 1 |
| GOTERM_BP_DIRECT | GO:0045944~positive regulation of transcription from RNA polymerase II promoter | 4 | 6.779661 | 0.414476 | WWOX, RARB, AHR, SMARCA2 | 38 | 1222 | 19414 | 1.672323 | 1 | 1 | 1 |
| GOTERM_CC_DIRECT | GO:0005654~nucleoplasm | 9 | 15.25424 | 0.471363 | WWOX, HTT, RARB, ZDHHC7, AHR, SMARCA2, SLC8A1, ADD1, RGS6 | 39 | 4031 | 20624 | 1.180696 | 1 | 1 | 1 |
| GOTERM_BP_DIRECT | GO:0006355~regulation of transcription, DNA-templated | 3 | 5.084746 | 0.577707 | RARB, AHR, SMARCA2 | 38 | 1005 | 19414 | 1.525059 | 1 | 1 | 1 |
| GOTERM_CC_DIRECT | GO:0000785~chromatin | 3 | 5.084746 | 0.584661 | RARB, AHR, SMARCA2 | 39 | 1053 | 20624 | 1.506611 | 1 | 1 | 1 |
| GOTERM_CC_DIRECT | GO:0005634~nucleus | 11 | 18.64407 | 0.711902 | DSP, WWOX, MMP2, PWWP2A, HTT, RARB, METTL6, AHR, SMARCA2, ADD1, RGS6 | 39 | 6033 | 20624 | 0.964201 | 1 | 1 | 1 |
| GOTERM_MF_DIRECT | GO:0003677~DNA binding | 3 | 5.084746 | 0.801347 | RARB, AHR, SMARCA2 | 40 | 1421 | 18945 | 0.999912 | 1 | 1 | 1 |
| UP_KW_BIOLOGICAL_PROCESS | KW-0805~Transcription regulation | 4 | 6.779661 | 0.854711 | PWWP2A, RARB, AHR, SMARCA2 | 22 | 2393 | 11262 | 0.855678 | 1 | 1 | 1 |
| UP_KW_BIOLOGICAL_PROCESS | KW-0804~Transcription | 4 | 6.779661 | 0.869078 | PWWP2A, RARB, AHR, SMARCA2 | 22 | 2462 | 11262 | 0.831696 | 1 | 1 | 1 |
| UP_KW_CELLULAR_COMPONENT | KW-0539~Nucleus | 9 | 15.25424 | 0.902803 | WWOX, MMP2, PWWP2A, HTT, RARB, METTL6, AHR, SMARCA2, RGS6 | 35 | 5722 | 17708 | 0.795786 | 1 | 1 | 1 |
| UP_KW_MOLECULAR_FUNCTION | KW-0238~DNA-binding | 3 | 5.084746 | 0.923448 | RARB, AHR, SMARCA2 | 23 | 2095 | 11749 | 0.731493 | 1 | 1 | 1 |
|  |  |  |  |  |  |  |  |  |  |  |  |  |
| **Annotation Cluster 6** | **Enrichment Score: 0.07746892509259574** |  |  |  |  |  |  |  |  |  |  |  |
| **Category** | **Term** | **Count** | **%** | **PValue** | **Genes** | **List Total** | **Pop Hits** | **Pop Total** | **Fold Enrichment** | **Bonferroni** | **Benjamini** | **FDR** |
| UP_KW_LIGAND | KW-0547~Nucleotide-binding | 5 | 8.474576 | 0.761724 | DGKG, GUCY1A2, SMARCA2, HCN2, PRKG1 | 19 | 1860 | 6858 | 0.970289 | 1 | 1 | 1 |
| GOTERM_MF_DIRECT | GO:0005524~ATP binding | 3 | 5.084746 | 0.838024 | DGKG, SMARCA2, PRKG1 | 40 | 1543 | 18945 | 0.920852 | 1 | 1 | 1 |
| UP_KW_LIGAND | KW-0067~ATP-binding | 3 | 5.084746 | 0.917358 | DGKG, SMARCA2, PRKG1 | 19 | 1441 | 6858 | 0.751452 | 1 | 1 | 1 |
|  |  |  |  |  |  |  |  |  |  |  |  |  |
| **Annotation Cluster 7** | **Enrichment Score: 0.06736592138935749** |  |  |  |  |  |  |  |  |  |  |  |
| **Category** | **Term** | **Count** | **%** | **PValue** | **Genes** | **List Total** | **Pop Hits** | **Pop Total** | **Fold Enrichment** | **Bonferroni** | **Benjamini** | **FDR** |
| UP_KW_DOMAIN | KW-0863~Zinc-finger | 4 | 6.779661 | 0.807709 | DGKG, UNC13C, TRIM3, RARB | 34 | 1840 | 14504 | 0.927366 | 1 | 1 | 1 |
| UP_KW_LIGAND | KW-0479~Metal-binding | 10 | 16.94915 | 0.824977 | DGKG, UNC13C, HPX, CPNE4, MMP2, TRIM3, XYLT1, RARB, SLC8A1, SLC25A13 | 19 | 3982 | 6858 | 0.906447 | 1 | 1 | 1 |
| UP_KW_LIGAND | KW-0862~Zinc | 5 | 8.474576 | 0.942335 | DGKG, UNC13C, MMP2, TRIM3, RARB | 19 | 2525 | 6858 | 0.714747 | 1 | 1 | 1 |
|  |  |  |  |  |  |  |  |  |  |  |  |  |

Supplementary table 5: UniProt Knowledgebase (UniProtKB) domain annotations

| **Category** | **Term** | **Count** | **%** | **PValue** | **Genes** | **List Total** | **Pop Hits** | **Pop Total** | **Fold Enrichment** | **Bonferroni** | **Benjamini** | **FDR** |
| --- | --- | --- | --- | --- | --- | --- | --- | --- | --- | --- | --- | --- |
| UP_KW_DOMAIN | KW-0677~Repeat | 21 | 35.59322 | 0.001911 | DSP, DGKG, UNC13C, WWOX, KRTAP12-3, DSCAM, KRTAP12-4, CPNE4, MMP2, TTC1, HTT, TSPEAR, AHR, SLC8A1, PREX2, PTPRD, HPX, DCHS2, ASPG, TRIM3, SLC25A13 | 34 | 5003 | 14504 | 1.790596 | 0.024559 | 0.024842 | 0.024842 |
